# Supplementary material for: Distinct patterns in the gut microbiota after surgical or medical therapy in obese patients
Source: PeerJ. 2017 Jun 20;5:e3443. doi: 10.7717/peerj.3443 (PMC5480389; doi:10.7717/peerj.3443)
Supplement: Table S2 [file peerj-05-3443-s002.xlsx]

## Sheet: Table S2
	Weight (kg)	BMI (kg/m2)	Waist circumference (cm)	Hip perimeter (cm)	Cholesterol (mg/dL)	Triglycerides (mg/dL)	HDL (mg/dL)	LDL (mg/dL)	Glycemia (mg/dL)	Insulin (mcU/dL)	HOMA	HbA1c (%)	SGOT (UI/L)	SGPT (UI/L)	GGT (UI/L)	Phosphatase A (UI/L)	Total Bilirrubin (mg/dL)	Direct Bilirrubin (mg/dL)	Total Protein (%)	Hto
Before treatment
MT.1.0	81.9	32.3959	90	105	179	107	73	84	81	15.1	3	5	25	32	13	86	0.29	0.12	91	39.8
MT.2.0	118.8	43.6364	118	108	170	115	40	107	88	50.1	10.9	6	21	28	24	86	0.25	0.11	106	45.8
MT.3.0	111.2	44.5441	107	120	218	151	54	133	84	35.9	7.5	5.9	10	15	34	69	0.27	0.11	76	39.2
MT.4.0	139.4	46.5769	130	133	137	74	51	71	98	100.4	24.3	5.8	69	105	142	111	0.67	0.25	72	43.2
MT.5.0	74	32.4547	90	100	259	153	56	173	110	22.3	6	6.7	32	44	36	107	0.41	0.15	115	43.7
MT.6.0	95.8	40.9244	103	113	189	83	48	125	112	32	8.9	5.6	40	67	36	65	0.2	0.11	110	40.6
MT.7.0	126.9	39.1667	110	125	165	114	37	106	103	46.2	11.8	5.9	49	99	85	80	0.33	0.15	108	48.1
MT.8.0	93.7	39.5092	102	120	163	78	70	78	84	24.5	5.1	5.6	23	30	38	66	0.38	0.15	98	41.8
MT.9.0	73	30.4772	120	120	190	106	39	129	100	29.5	7.3	6.2	47	95	26	75	0.81	0.28	98	45
GB.1.0	101.5	37.2819	96	116	188	208	34	112	84	12.1	2.5	5.4	14	14	17	73	0.43	0.15	102	43.7
GB.2.0	108	39.6694	119	125	170	91	43	108	83	30.8	6.3	5.4	19	25	17	81	0.29	0.11	97	41
GB.3.0	94.3	34.2212	86	117	148	112	52	74	87	14.4	2.8	5.6	16	10	16	42	0.34	0.12	92	38
GB.4.0	113	40.0368	109	120	208	197	45	125	96	12.8	3	5.5	17	18	20	79	0.5	0.15	104	41.8
GB.5.0	83.5	34.3113	103	104	370	1137	43	100	117	13.5	2.6	5.7	27	21	15	0	0.15	0.09	97	33.7
SG.1.0	80.8	32.3666	85	105	182	263	32	98	74	16.1	2.9	4.7	10	12	14	99	0.24	0.11	100	41.6
SG.2.0	84.4	32.9688	86	110	206	114	63	121	76	5.8	1.1	5.5	18	17	13	66	0.51	0.2	91	43
SG.3.0	85.4	37.9556	97	101	172	220	32	93	77	12.9	2.5	5.4	66	41	25	57	0.29	0.13	92	37.7
SG.4.0	95.7	35.5815	111	not taken	154	111	53	78	104	17.9	4.6	6	26	45	47	106	71	0.29	102	41.1
SG.5.0	98	36.8851	97	not taken	157	50	42	105	117	18.8	4	5.7	25	28	17	98	0.99	0.38	100	41.8
After 6 months of treatment
MT.1.6	74	29.271	82	102	173	87	73	83	78	11.1	2.1	5.3	20	19	11	89	0.42	0.17	95	39.5
MT.2.6	111.9	41.1019	111	108	165	83	42	106	93	23.1	5.3	6	27	39	21	82	0.49	0.23	109	47.4
MT.3.6	114	45.6658	107	134	192	144	54	109	89	29.4	6.5	5.4	11	10	19	71	0.21	0.09	97	39.6
MT.4.6	141.9	47.4122	133	137	162	57	64	87	105	64.3	16.7	6.1	74	88	135	115	0.77	0.36	78	45.7
MT.5.6	75	32.8933	93	102	153	133	50	76	112	17.3	4.8	6.9	34	41	34	88	0.48	0.22	129	42.3
MT.6.6	96.1	41.0526	97	108	188	110	48	118	100	29.7	7.3	5.9	24	41	28	70	0.37	0.16	102	39.8
MT.7.6	118.1	36.4506	97	114	187	147	43	115	82	30.5	6.2	5.7	50	54	51	76	0.3	0.15	115	46.5
MT.8.6	90.4	38.1177	98	102	183	97	57	107	83	19	3.9	5.9	18	25	18	65	0.73	0.27	105	39.8
MT.9.6	74	28.5483	76	94	199	127	74	100	72	10.9	1.9	5.2	24	18	11	47	0.32	0.19	113	40.5
GB.1.6	76.4	28.0624	76	98	142	100	42	80	75	4.3	0.8	5.3	14	10	7	69	0.63	0.24	92	41.2
GB.2.6	80	29.3848	79	104	122	80	34	72	85	10.9	2.3	5.8	15	10	11	107	0.38	0.18	80	36.4
GB.3.6	65.3	23.6972	70	94	119	90	46	55	74	6	1.1	5.4	17	12	7	55	0.3	0.17	81	36.2
GB.4.6	82.9	29.3722	87	100	143	84	48	78	80	3.4	0.7	5.4	17	18	9	97	0.57	0.22	96	37.9
GB.5.6	56.1	23.0523	70	90	217	244	63	105	77	4.9	0.9	5.5	19	16	9	102	0.24	0.11	108	28
SG.1.6	57.3	22.9531	66	85	170	106	42	107	78	5	1	5.4	11	8	11	83	0.5	0.19	88	39.6
SG.2.6	59.9	23.3984	66	89	168	138	57	83	76	6.5	1.2	6.4	14	12	13	64	0.33	0.14	102	37.2
SG.3.6	67.5	30	85	92	174	643	24	21	72	11.2	2	5.3	18	19	9	78	0.12	0.09	110	33.9
SG.4.6	62.9	23.3864	77	94	194	85	65	112	74	5	0.9	5.3	17	19	12	73	0.38	0.14	114	42.7
SG.5.6	65.8	24.7657	74	95	151	56	62	78	77	4.4	0.8	5.6	18	17	10	92	0.82	0.32	92	38.2
After 12 months of treatment
MT.1.12	79.3	31.3674	89	103	201	130	86	89	72	6.5	1.2	5.1	28	32	10	72	0.4	0.18	109	41.1
MT.2.12	116.4	42.7548	113	109	162	159	33	97	88	33.7	7.3	5.9	20	32	19	77	0.36	0.14	105	44.2
MT.3.12	not taken	not taken	not taken	not taken	not taken	not taken	not taken	not taken	not taken	not taken	not taken	not taken	not taken	not taken	not taken	not taken	not taken	not taken	not taken	not taken
MT.4.12	145.7	48.6819	126	134	152	54	61	80	101	74.8	18.7	6	120	141	186	106	1.01	0.49	80	45.7
MT.5.12	74.2	32.5424	87	100	262	212	46	174	113	16.6	4.6	6.6	37	60	44	96	0.48	0.16	117	43.3
MT.6.12	99.9	42.6759	83	120	232	178	46	150	104	22.5	5.8	5.9	104	159	48	77	0.37	0.27	109	42.5
MT.7.12	120.6	37.2222	107	123	204	239	37	119	87	30.5	10.2	5.8	32	72	95	78	0.3	0.14	111	49.8
MT.8.12	not taken	not taken	not taken	not taken	not taken	not taken	not taken	not taken	not taken	not taken	not taken	not taken	not taken	not taken	not taken	not taken	not taken	not taken	not taken	not taken
MT.9.12	not taken	not taken	not taken	not taken	not taken	not taken	not taken	not taken	not taken	not taken	not taken	not taken	not taken	not taken	not taken	not taken	not taken	not taken	not taken	not taken
GB.1.12	78.1	28.6869	86	101	164	79	54	94	69	3.1	0.5	5.3	15	12	7	74	0.48	0.2	110	40.4
GB.2.12	80	29.3848	79	104	146	74	44	87	80	10.9	2.2	5.8	15	9	9	98	0.41	0.18	94	36
GB.3.12	64.1	23.2617	70	94	127	93	54	54	70	4.6	0.8	5.3	16	13	5	55	0.27	0.14	79	34.7
GB.4.12	78.8	27.9195	86	101	147	62	60	75	69	3.7	0.6	5.2	33	30	8	95	0.37	0.12	97	39
GB.5.12	52.6	21.6141	67	87	262	162	100	130	71	4.1	0.7	5.1	28	22	10	95	0.28	0.12	130	35
SG.1.12	52.7	21.1104	67	84	159	96	50	90	73	6.5	1.2	5.2	14	10	14	66	0.71	0.26	98	39.3
SG.2.12	55.9	21.8359	63	86	189	88	79	92	76	5.2	1	5.5	12	12	15	56	0.4	0.15	106	42.5
SG.3.12	67.2	29.8667	85	90	141	246	36	56	71	15.7	2.8	5.2	17	13	10	51	0.23	0.1	104	34.1
SG.4.12	62.3	23.1633	73	91	200	78	68	116	82	7.8	1.6	5.6	17	16	11	74	0.33	0.14	116	42.7
SG.5.12	66.5	25.0292	74	96	197	84	70	110	77	4.9	0.9	6	21	18	15	97	0.57	0.22	102	42.8
