# Supplementary material for: Distinct patterns in the gut microbiota after surgical or medical therapy in obese patients
Source: PeerJ. 2017 Jun 20;5:e3443. doi: 10.7717/peerj.3443 (PMC5480389; doi:10.7717/peerj.3443)
Supplement: Table S4 [file peerj-05-3443-s004.xlsx]

## Sheet: Actinobacteria
ID_Sample	Ct Mean	Ct SD	Quantity (ng/ul)	Quantity SD	16s Copy number		genome size	2389526
MT.1.0	21.9044	0.048042	0.000928222	2.47686e-05	14172.7		16s copy numbe in genome	4
MT.2.0	21.2391	0.108345	0.0013442	8.08523e-05	20524.2
MT.3.0	13.8254	0.0365589	0.0825449	0.00167707	1.26035e+06
MT.4.0	25.4683	0.0532669	0.000128199	3.7928e-06	1957.43		STANDARD CURVE 1	Cт	Cт Mean	Cт SD	Quantity (ng/ul)
MT.5.0	23.8386	0.516258	0.000323463	9.15113e-05	4938.84		STANDARD	13.6031	13.5439	0.0513426	0.1
MT.6.0	24.4312	0.217089	0.000229123	2.72217e-05	3498.41		STANDARD	13.5155	13.5439	0.0513426	0.1
MT.7.0	18.3155	0.850445	0.00730869	0.00315571	111594		STANDARD	13.513	13.5439	0.0513426	0.1
MT.8.0	22.1807	0.222999	0.000799976	9.53352e-05	12214.6		STANDARD	17.8862	17.5635	0.394668	0.01
MT.9.0	16.5712	0.300144	0.018121	0.00297583	276684		STANDARD	17.1235	17.5635	0.394668	0.01
GB.1.0	26.1473	0.296505	8.8497e-05	1.45105e-05	1351.23		STANDARD	17.6809	17.5635	0.394668	0.01
GB.2.0	25.471	0.0972253	0.000128107	7.0224e-06	1956.01		STANDARD	21.8664	21.7294	0.126075	0.001
GB.3.0	36.6098	0.523209	2.68556e-07	7.69725e-08	4.10049		STANDARD	21.7036	21.7294	0.126075	0.001
GB.4.0	19.4656	0.116835	0.00360071	0.000233527	54977.9		STANDARD	21.6182	21.7294	0.126075	0.001
GB.5.0	23.8559	1.59544	0.000509877	0.000484358	7785.14		STANDARD	26.352	25.9308	0.595644	0.0001
SG.1.0	21.8849	0.746523	0.00122958	0.000445663	18774.1		STANDARD	25.5097	25.9308	0.595644	0.0001
SG.2.0	27.7125	0.128172	4.31523e-05	3.09296e-06	658.878		STANDARD	29.8792	30.0885	0.181337	1e-05
SG.3.0	18.0646	0.407081	0.0103024	0.00245417	157303		STANDARD	30.1875	30.0885	0.181337	1e-05
SG.4.0	23.4651	0.550795	0.000491257	0.000141026	7500.83		STANDARD	30.1988	30.0885	0.181337	1e-05
SG.5.0	18.9727	0.148552	0.00473799	0.000390537	72342.7		Negative Control	34.8527
							Negative Control	35.1186
ID_Sample	Ct Mean	Ct SD	Quantity (ng/ul)	Quantity SD	16s Copy number		Negative Control	33.5316
MT.1.6	18.677	0.271521	0.00561554	0.000816905	85741.7
MT.2.6	20.1888	0.667682	0.00252642	0.00101001	38575.1
MT.3.6	21.0029	0.0771793	0.00153198	6.56601e-05	23391.3		STANDARD CURVE 2	Cт	Cт Mean	Cт SD	Quantity (ng/ul)
MT.4.6	25.4683	0.0532669	0.000128199	3.7928e-06	1957.43		STANDARD	13.7497	14.0537	0.418723	0.1
MT.5.6	20.0893	0.0655639	0.00254489	9.17997e-05	38857		STANDARD	13.8801	14.0537	0.418723	0.1
MT.6.6	21.7496	0.302316	0.00101853	0.000170248	15551.6		STANDARD	14.5313	14.0537	0.418723	0.1
MT.7.6	20.725	0.120544	0.00178964	0.000121675	27325.4		STANDARD	18.2935	17.9777	0.27349	0.01
MT.8.6	20.7063	0.20363	0.00181312	0.000198021	27683.9		STANDARD	17.8218	17.9777	0.27349	0.01
MT.9.6	22.4678	0.594381	0.000704943	0.000247426	10763.5		STANDARD	17.8178	17.9777	0.27349	0.01
GB.1.6	17.5793	0.0310567	0.0102575	0.000177148	156618		STANDARD	23.0586	21.886	1.16142	0.001
GB.2.6	22.1805	0.129219	0.000797139	5.717e-05	12171.2		STANDARD	21.8633	21.886	1.16142	0.001
GB.3.6	25.9741	0.198526	9.70703e-05	1.06833e-05	1482.13		STANDARD	20.7361	21.886	1.16142	0.001
GB.4.6	19.33	0.12	0.00473799	0.000193148	72342.7		STANDARD	26.7972	26.9356	0.664463	0.0001
GB.5.6	20.2109	0.713425	0.00317697	0.00133892	48508.1		STANDARD	26.3512	26.9356	0.664463	0.0001
SG.1.6	22.1885	0.500099	0.0010062	0.00026225	15363.3		STANDARD	27.6583	26.9356	0.664463	0.0001
SG.2.6	16.2168	0.158139	0.0288596	0.00251388	440648		STANDARD	29.1786	Undetermined	Undetermined	1e-05
SG.3.6	36.6	0.68	2.05606e-07	0.00273288	3.13932		STANDARD	29.1786	29.1786	Undetermined	1e-05
SG.4.6	16.3735	0.469428	0.0269856	0.00742749	412033		STANDARD	29.1786	Undetermined	Undetermined	1e-05
SG.5.6	29.3259	0.376603	4.29318e-05	9.64332e-06	655.511		Negative Control	30.3417
							Negative Control	32.61
							Negative Control	36.8959

## Sheet: Bacteroides
ID_Sample	Ct Mean	Ct SD	Quantity (ng/ul)	Quantity SD	16s Copy number		genome size	5487768
MT.1.0	11.7405	0.318773	5.46995	1.26581	9.0916e+06		16s copy numbe in genome	1
MT.2.0	16.1448	1.19348	0.305366	0.201742	507549
MT.3.0	14.3076	0.583891	0.953943	0.412896	1.58555e+06
MT.4.0	18.0629	1.61999	0.0902804	0.0628033	150055		STANDARD CURVE 1	Cт	Cт Mean	Cт SD	Quantity (ng/ul)
MT.5.0	14.0944	0.106767	1.04643	0.07609	1.73927e+06		STANDARD	17.3469	17.1577	0.184085	0.1
MT.6.0	14.9576	0.389571	0.58749	0.16829	976466		STANDARD	17.147	17.1577	0.184085	0.1
MT.7.0	14.3974	0.203639	0.851593	0.121424	1.41543e+06		STANDARD	16.9792	17.1577	0.184085	0.1
MT.8.0	15.9229	0.830331	0.327019	0.189174	543538		STANDARD	20.6711	20.618	0.0750066	0.01
MT.9.0	15.6491	0.736166	0.388535	0.216276	645784		STANDARD	20.565	20.618	0.0750066	0.01
GB.1.0	27.3615	0.598608	0.000107689	4.36915e-05	178.99		STANDARD	Undetermined			0.01
GB.2.0	16.9234	0.428627	0.150066	0.0439755	249425		STANDARD	24.3939	24.5191	0.176947	0.001
GB.3.0	16.943	0.274298	0.145474	0.0268393	241792		STANDARD	Undetermined			0.001
GB.4.0	14.1807	0.134671	0.986558	0.0947602	1.63976e+06		STANDARD	24.6442	24.5191	0.176947	0.001
GB.5.0	17.5387	0.0447248	0.164086	0.00462313	272728		STANDARD	27.982	27.8999	0.116127	0.0001
SG.1.0	17.5294	0.540667	0.171794	0.0624855	285539		STANDARD	27.8178	27.8999	0.116127	0.0001
SG.2.0	18.6928	0.123824	0.0797066	0.00620058	132480		STANDARD	Undetermined			0.0001
SG.3.0	16.805	0.0145943	0.259895	0.00237868	431972		STANDARD	32.1839	32.1839		1e-05
SG.4.0	19.049	0.0659568	0.0636501	0.00263206	105793		STANDARD	30.3466	31.2632	1.29624	1e-05
SG.5.0	14.9767	0.0208167	2.07144	0.0274393	3.44293e+06		STANDARD	32.1798	31.2632	1.29624	1e-05
							Negative Control	34.7066
ID_Sample	Ct Mean	Ct SD	Quantity (ng/ul)	Quantity SD	16s Copy number		Negative Control	Undetermined
MT.1.6	15.1344	0.291017	0.513074	0.0978897	852779		Negative Control	Undetermined
MT.2.6	16.9354	0.315262	0.146911	0.0333151	244181
MT.3.6	16.1245	1.02468	0.305061	0.23585	507041
MT.4.6	22.0977	1.35839	0.00546794	0.00545722	9088.26		STANDARD CURVE 2	Cт	Cт Mean	Cт SD	Quantity (ng/ul)
MT.5.6	14.6786	0.0814671	0.696225	0.0398448	1.15719e+06		STANDARD	18.5439	18.328	0.186971	0.1
MT.6.6	16.9305	0.401306	0.14861	0.03787	247004		STANDARD	18.2207	18.328	0.186971	0.1
MT.7.6	15.8213	0.460406	0.324315	0.0967233	539043		STANDARD	18.2195	18.328	0.186971	0.1
MT.8.6	12.6739	0.321369	2.85719	0.671614	4.74892e+06		STANDARD	22.1601	21.9597	0.208732	0.01
MT.9.6	16.706	1.00428	0.20201	0.153098	335761		STANDARD	21.7435	21.9597	0.208732	0.01
GB.1.6	15.099	0.0835458	0.5196	0.0297019	863626		STANDARD	21.9755	21.9597	0.208732	0.01
GB.2.6	11.7027	0.0714435	5.4	0.11702	8.97533e+06		STANDARD	26.026	25.7284	0.262848	0.001
GB.3.6	15.1941	0.409948	0.499146	0.142549	829629		STANDARD	25.6312	25.7284	0.262848	0.001
GB.4.6	12.2479	0.823356	4.24273	2.61174	7.05183e+06		STANDARD	25.5279	25.7284	0.262848	0.001
GB.5.6	15.2979	0.262006	0.674783	0.110483	1.12156e+06		STANDARD	29.1085	29.3473	0.216553	0.0001
SG.1.6	19.4767	0.190544	0.0488831	0.00576777	81248.5		STANDARD	29.531	29.3473	0.216553	0.0001
SG.2.6	15.7888	0.00519317	0.491538	0.00160084	816985		STANDARD	29.4023	29.3473	0.216553	0.0001
SG.3.6	19.9447	0.526091	0.0376207	0.0124415	62529.3		STANDARD	32.9762	32.9923	0.660296	1e-05
SG.4.6	16.4114	0.235419	0.3351	0.05052	556969		STANDARD	33.6605	32.9923	0.660296	1e-05
SG.5.6	17.9881	0.180175	0.413526	0.0420511	687320		STANDARD	32.3402	32.9923	0.660296	1e-05
							Negative Control	36.4325
							Negative Control	Undetermined
							Negative Control	Undetermined

## Sheet: Enterobacteria
ID_Sample	Ct Mean	Ct SD	Quantity (ng/ul)	Quantity SD	16s Copy number		genome size	4558660
MT.1.0	25.8228	0.108826	6.05607e-05	3.98067e-06	848.212		16s copy numbe in genome	7
MT.2.0	24.4011	0.287274	0.000144643	2.5137e-05	2025.87
MT.3.0	15.722	0.037098	0.02811	0.000634007	393708
MT.4.0	27.6707	0.125857	1.96903e-05	1.50531e-06	275.782		STANDARD CURVE 1	Cт	Cт Mean	Cт SD	Quantity (ng/ul)
MT.5.0	21.578	0.0457856	0.000798982	2.22398e-05	11190.5		STANDARD	13.5381	13.5949	0.0627944	0.1
MT.6.0	30.8741	0.147166	2.80922e-06	2.51035e-07	39.3459		STANDARD	13.5843	13.5949	0.0627944	0.1
MT.7.0	24.6396	0.337938	0.000125976	2.69818e-05	1764.41		STANDARD	13.6623	13.5949	0.0627944	0.1
MT.8.0	26.4376	0.236343	4.18287e-05	5.99028e-06	585.852		STANDARD	17.4376	17.3878	0.0981106	0.01
MT.9.0	18.5519	1.12467	0.00592111	0.00425893	82931		STANDARD	17.451	17.3878	0.0981106	0.01
GB.1.0	22.6959	0.423011	0.000414236	0.000112867	5801.77		STANDARD	17.2748	17.3878	0.0981106	0.01
GB.2.0	31.717	0.173726	1.684e-06	1.7755e-07	23.5861		STANDARD	21.5087	21.3963	0.10658	0.001
GB.3.0	27.1152	0.0671787	2.75722e-05	1.12591e-06	386.176		STANDARD	21.3835	21.3963	0.10658	0.001
GB.4.0	22.1374	0.476305	0.000585307	0.000179321	8197.79		STANDARD	21.2966	21.3963	0.10658	0.001
GB.5.0	16.9189	0.960841	0.0141601	0.00913874	198325		STANDARD	25.0311	24.8823	0.129464	0.0001
SG.1.0	27.6147	1.24649	2.09628e-05	1.56078e-05	293.604		STANDARD	24.7951	24.8823	0.129464	0.0001
SG.2.0	23.249	1.31222	0.000320412	0.000276785	4487.68		STANDARD	24.8207	24.8823	0.129464	0.0001
SG.3.0	23.2239	0.904329	0.00028803	0.000174912	4034.15		Negative Control	Undetermined
SG.4.0	19.8881	1.25079	0.00231393	0.00162402	32408.9		Negative Control	Undetermined
SG.5.0	23.0633	0.0862168	0.000799594	0.00475893	11199.1		Negative Control	35.2738
ID_Sample	Ct Mean	Ct SD	Quantity (ng/ul)	Quantity SD	16s Copy number
MT.1.6	23.3853	0.419018	0.000272222	7.25091e-05	3812.73		STANDARD CURVE 2	Cт	Cт Mean	Cт SD	Quantity (ng/ul)
MT.2.6	23.7777	0.756243	0.000225411	0.000107074	3157.1		STANDARD	13.7549	13.5589	0.178199	0.1
MT.3.6	25.2147	0.0239462	8.75306e-05	1.27438e-06	1225.95		STANDARD	13.4067	13.5589	0.178199	0.1
MT.4.6	44.3091	0.163986	6.0809e-10	0.000635645	0.00851689		STANDARD	13.5152	13.5589	0.178199	0.1
MT.5.6	25.1609	0.136724	7.88035e-05	8.98707e-06	1103.72		STANDARD	17.2917	17.1641	0.173182	0.01
MT.6.6	34.8154	0.502546	2.08343e-07	5.8456e-07	2.91805		STANDARD	16.9669	17.1641	0.173182	0.01
MT.7.6	22.2589	0.207856	0.000530142	6.68223e-05	7425.16		STANDARD	17.2336	17.1641	0.173182	0.01
MT.8.6	23.6723	0.281479	0.000225218	3.8358e-05	3154.39		STANDARD	21.6981	21.1959	0.437867	0.001
MT.9.6	22.4052	0.20156	0.000484907	5.92788e-05	6791.6		STANDARD	20.9957	21.1959	0.437867	0.001
GB.1.6	14.7862	0.114401	0.0497074	0.00345478	696200		STANDARD	20.894	21.1959	0.437867	0.001
GB.2.6	17.3781	0.107975	0.0102829	0.000678445	144022		STANDARD	24.9273	24.6855	0.221517	0.0001
GB.3.6	26.5954	0.368467	3.82799e-05	8.50507e-06	536.147		STANDARD	24.4924	24.6855	0.221517	0.0001
GB.4.6	29.455	0.143986	6.65706e-06	5.8206e-07	93.2386		STANDARD	24.6368	24.6855	0.221517	0.0001
GB.5.6	17.0894	0.124854	0.0112696	0.000884043	157842		Negative Control	34.1556
SG.1.6	21.5847	0.503924	0.000728643	0.000204247	10205.4		Negative Control	Undetermined
SG.2.6	15.166	0.138916	0.0368335	0.00314761	515889		Negative Control	Undetermined
SG.3.6	33.5092	1.76835	6.79187e-07	7.09386e-07	9.51267
SG.4.6	11.4476	0.110427	0.36276	0.0246365	5.0808e+06
SG.5.6	21.7	0.156286	0.000660593	8.54317e-06	9252.25

## Sheet: Firmicutes
ID_Sample	Ct Mean	Ct SD	Quantity (ng/ul)	Quantity SD	16s Copy number		genome size	2389526
MT.1.0	12.9308	0.134901	0.97546	0.0830792	1.4894e+07		16s copy numbe in genome	4
MT.2.0	16.5252	0.171717	0.103258	0.0107406	1.57661e+06
MT.3.0	12.8258	0.377827	1.05804	0.237895	1.61548e+07
MT.4.0	19.7276	0.235767	0.0139932	0.00196814	213658		STANDARD CURVE 1	Cт	Cт Mean	Cт SD	Quantity (ng/ul)
MT.5.0	15.0969	0.0877053	0.251486	0.0135655	3.83985e+06		STANDARD	12.9662	12.9265	0.0662235	1
MT.6.0	16.089	0.042016	0.135144	0.00354928	2.06347e+06		STANDARD	12.8501	12.9265	0.0662235	1
MT.7.0	13.8715	0.286543	0.546206	0.0957171	8.33982e+06		STANDARD	12.9632	12.9265	0.0662235	1
MT.8.0	15.143	0.136091	0.244686	0.0211807	3.73602e+06		STANDARD	16.4606	16.5297	0.0670816	0.1
MT.9.0	15.0201	0.148034	0.264341	0.0240382	4.03613e+06		STANDARD	16.5945	16.5297	0.0670816	0.1
GB.1.0	18.4048	0.0967504	0.0318062	0.00189302	485638		STANDARD	16.5341	16.5297	0.0670816	0.1
GB.2.0	18.1422	0.0259121	0.0374402	0.000609097	571662		STANDARD	20.3298	20.2176	0.103793	0.01
GB.3.0	17.2152	0.107502	0.0669302	0.00452894	1.02193e+06		STANDARD	20.125	20.2176	0.103793	0.01
GB.4.0	11.9188	0.240451	1.84587	0.278854	2.8184e+07		STANDARD	20.198	20.2176	0.103793	0.01
GB.5.0	15.1337	0.0983423	0.211481	0.0128473	3.22904e+06		STANDARD	23.8323	23.9762	0.177597	0.001
SG.1.0	16.6426	0.00479794	0.0834078	0.000246421	1.27352e+06		STANDARD	23.9216	23.9762	0.177597	0.001
SG.2.0	17.2292	0.353547	0.0590773	0.0134632	902031		STANDARD	24.1746	23.9762	0.177597	0.001
SG.3.0	15.6649	0.0386289	0.152325	0.00364586	2.3258e+06		STANDARD	27.6036	27.6201	0.0217746	0.0001
SG.4.0	17.1893	0.195385	0.0598506	0.00693757	913839		STANDARD	27.612	27.6201	0.0217746	0.0001
SG.5.0	15.2567	0.120968	0.483105	0.0265782	7.37637e+06		STANDARD	27.6448	27.6201	0.0217746	0.0001
							Negative Control	33.3514
ID_Sample	Ct Mean	Ct SD	Quantity (ng/ul)	Quantity SD	16s Copy number		Negative Control	32.5662
MT.1.6	17.2948	0.0469607	0.0636024	0.00185729	971122		Negative Control	32.8626
MT.2.6	17.2349	0.161211	0.0662408	0.0068366	1.01141e+06
MT.3.6	18.7067	0.317681	0.0266603	0.00544549	407067
MT.4.6	20.8231	0.110506	0.00701636	0.000480813	107130		STANDARD CURVE 2	Cт	Cт Mean	Cт SD	Quantity (ng/ul)
MT.5.6	15.4386	0.129457	0.203361	0.0168205	3.10504e+06		STANDARD	12.5386	12.6409	0.136027	1
MT.6.6	17.193	1.29014	0.0851486	0.0721437	1.30011e+06		STANDARD	12.7953	12.6409	0.136027	1
MT.7.6	17.6293	0.188617	0.0518322	0.00629847	791408		STANDARD	12.5888	12.6409	0.136027	1
MT.8.6	12.8385	0.163229	1.03449	0.106488	1.57952e+07		STANDARD	16.3791	16.3229	0.0489435	0.1
MT.9.6	15.5085	0.504243	0.201092	0.0676109	3.07041e+06		STANDARD	16.2902	16.3229	0.0489435	0.1
GB.1.6	13.6447	0.135391	0.624253	0.0514937	9.5315e+06		STANDARD	16.2993	16.3229	0.0489435	0.1
GB.2.6	15.2128	0.132782	0.234216	0.0198775	3.57616e+06		STANDARD	20.0777	20.0982	0.0607484	0.01
GB.3.6	15.2941	0.0851177	0.222305	0.0116427	3.3943e+06		STANDARD	20.0503	20.0982	0.0607484	0.01
GB.4.6	13.43	0.386512	0.7268	0.185665	1.10973e+07		STANDARD	20.1665	20.0982	0.0607484	0.01
GB.5.6	13.7958	0.194467	0.483757	0.0596284	7.38633e+06		STANDARD	23.7085	23.7528	0.131158	0.001
SG.1.6	16.3397	0.380036	0.102436	0.0252724	1.56406e+06		STANDARD	23.9004	23.7528	0.131158	0.001
SG.2.6	12.6606	0.246826	0.975718	0.141492	1.48979e+07		STANDARD	23.6496	23.7528	0.131158	0.001
SG.3.6	18.8119	0.15082	0.0219971	0.00209425	335866		STANDARD	27.6993	27.6233	0.0694415	0.0001
SG.4.6	12.5925	0.079198	1.01078	0.0492028	1.54332e+07		STANDARD	27.5632	27.6233	0.0694415	0.0001
SG.5.6	14.3	0.124747	0.352672	0.0187975	5.38483e+06		STANDARD	27.6074	27.6233	0.0694415	0.0001
							Negative Control	32.7126
							Negative Control	33.2461
							Negative Control	33.2878

## Sheet: Total Bacteria
ID_Sample	Ct Mean	Ct SD	Quantity (ng/ul)	Quantity SD	16s Copy number		genome size	4558660
MT.1.0	11.2764	0.0915056	2.2548	0.123059	3.15807e+07		16s copy numbe in genome	7
MT.2.0	15.4893	0.252556	0.187189	0.029001	2.62177e+06
MT.3.0	11.864	0.170819	1.5959	0.164457	2.23521e+07
MT.4.0	18.8736	0.243029	0.0251999	0.00361951	352950		STANDARD CURVE 1	Cт	Cт Mean	Cт SD	Quantity (ng/ul)
MT.5.0	12.7574	0.135324	0.93898	0.076474	1.31513e+07		STANDARD	12.1639	12.5889	0.385465	1
MT.6.0	14.0969	0.0866484	0.424158	0.0219226	5.94074e+06		STANDARD	12.6867	12.5889	0.385465	1
MT.7.0	12.2178	0.0282867	1.28989	0.0215305	1.80661e+07		STANDARD	12.9159	12.5889	0.385465	1
MT.8.0	13.9332	0.282797	0.471324	0.0790563	6.60135e+06		STANDARD	16.3868	16.4523	0.114242	0.1
MT.9.0	13.6422	0.279837	0.559796	0.0908572	7.84049e+06		STANDARD	16.5842	16.4523	0.114242	0.1
GB.1.0	17.3197	0.0823701	0.0628732	0.00303746	880600		STANDARD	16.386	16.4523	0.114242	0.1
GB.2.0	15.8623	0.184959	0.149393	0.0163337	2.09239e+06		STANDARD	20.6445	20.6163	0.0459498	0.01
GB.3.0	15.3899	0.0375957	0.197059	0.00438777	2.76e+06		STANDARD	20.5633	20.6163	0.0459498	0.01
GB.4.0	11.0976	0.0610354	2.50492	0.090537	3.50838e+07		STANDARD	20.6411	20.6163	0.0459498	0.01
GB.5.0	13.7885	0.188878	0.551524	0.0618849	7.72463e+06		STANDARD	24.1031	24.4052	0.40545	0.001
SG.1.0	15.1005	0.477455	0.259383	0.0770931	3.63292e+06		STANDARD	24.2466	24.4052	0.40545	0.001
SG.2.0	16.4985	0.425763	0.112545	0.0291477	1.5763e+06		STANDARD	24.866	24.4052	0.40545	0.001
SG.3.0	14.6146	0.21872	0.338468	0.0453992	4.74058e+06		STANDARD	27.9304	28.0501	0.201435	0.0001
SG.4.0	15.9229	0.156329	0.154942	0.078637	2.17011e+06		STANDARD	27.9373	28.0501	0.201435	0.0001
SG.5.0	13.81	0.177764	0.642334	0.0532849	8.99652e+06		STANDARD	28.2827	28.0501	0.201435	0.0001
							Negative Control	31.0712
ID_Sample	Ct Mean	Ct SD	Quantity (ng/ul)	Quantity SD	16s Copy number		Negative Control	32.0106
MT.1.6	15.5596	0.299381	0.180023	0.0307188	2.5214e+06		Negative Control	31.7073
MT.2.6	16.2451	0.102911	0.118875	0.00711581	1.66496e+06
MT.3.6	16.3319	0.13936	0.113029	0.00914534	1.58308e+06
MT.4.6	18.1404	0.359461	0.0392017	0.00780772	549058		STANDARD CURVE 2	Cт	Cт Mean	Cт SD	Quantity (ng/ul)
MT.5.6	13.7927	0.00910979	0.507434	0.00273799	7.10711e+06		STANDARD	12.3835	12.7275	0.347081	1
MT.6.6	16.3556	0.169171	0.111577	0.01123	1.56274e+06		STANDARD	12.7216	12.7275	0.347081	1
MT.7.6	15.4576	0.18188	0.190003	0.0198617	2.66118e+06		STANDARD	13.0776	12.7275	0.347081	1
MT.8.6	11.6232	0.158805	1.83971	0.176558	2.57669e+07		STANDARD	16.5892	16.6922	0.105025	0.1
MT.9.6	15.0822	0.133178	0.236912	0.0188595	3.31819e+06		STANDARD	16.7991	16.6922	0.105025	0.1
GB.1.6	12.1609	0.0473868	1.33433	0.0371732	1.86886e+07		STANDARD	16.6884	16.6922	0.105025	0.1
GB.2.6	11.8581	0.0656641	1.5966	0.0620811	2.23619e+07		STANDARD	20.3399	20.574	0.32136	0.01
GB.3.6	13.252	0.261294	0.703174	0.108395	9.84864e+06		STANDARD	20.4417	20.574	0.32136	0.01
GB.4.6	11.8149	0.108007	1.63908	0.104785	2.29569e+07		STANDARD	20.9404	20.574	0.32136	0.01
GB.5.6	13.0756	0.100526	0.83914	0.0502756	1.1753e+07		STANDARD	24.311	24.4803	0.147294	0.001
SG.1.6	15.1711	0.097168	0.242229	0.0140051	3.39266e+06		STANDARD	24.5515	24.4803	0.147294	0.001
SG.2.6	11.8841	0.0992322	1.70071	0.0983401	2.38201e+07		STANDARD	24.5785	24.4803	0.147294	0.001
SG.3.6	16.9505	0.0869636	0.084324	0.00440157	1.18104e+06		STANDARD	28.056	28.2519	0.241476	0.0001
SG.4.6	11.7458	0.125797	1.84723	0.135562	2.58723e+07		STANDARD	28.178	28.2519	0.241476	0.0001
SG.5.6	14.38	0.0365868	0.38738	0.132695	5.42563e+06		STANDARD	28.5217	28.2519	0.241476	0.0001
							Negative Control	32.9425
							Negative Control	31.956
							Negative Control	31.4965
