# Supplementary material for: Distinct patterns in the gut microbiota after surgical or medical therapy in obese patients
Source: PeerJ. 2017 Jun 20;5:e3443. doi: 10.7717/peerj.3443 (PMC5480389; doi:10.7717/peerj.3443)
Supplement: Table S5 [file peerj-05-3443-s005.xlsx]

## Sheet: MiSeq relative abundance Phylum
ID	Actinobacteria	Bacteroidetes	Firmicutes	Proteobacteria		ID	Actinobacteria	Bacteroidetes	Firmicutes	Proteobacteria		ID	Actinobacteria	Bacteroidetes	Firmicutes	Proteobacteria
BG.1.0	0.00244526	0.245693	0.746395	0.00511538		MG.1.0	0.0159773	0.41149	0.544983	0.022902		TM.1.0	0.010077	0.32233	0.61499	0.041778
BG.2.0	0.0255696	0.212445	0.647886	0.113895		MG.2.0	0.0011853	0.394579	0.602049	0.00189084		TM.2.0	0.0182102	0.307525	0.65635	0.0169427
BG.3.0	0.0225488	0.278406	0.687125	0.0095518		MG.3.0	0.0175828	0.440607	0.514825	0.0188649		TM.3.0	0.152993	0.199465	0.621145	0.0262617
BG.4.0	0.00334702	0.239569	0.680842	0.0176591		MG.4.0	0.00614846	0.317087	0.661546	0.0149778		TM.4.0	0.00798362	0.186353	0.723841	0.0729281
BG.5.0	0.0363217	0.243164	0.669218	0.03717		MG.5.0	0.0110114	0.372094	0.592658	0.0103392		TM.5.0	0.0201855	0.438061	0.481942	0.00491343
BG.1.6	0.0183982	0.207266	0.711217	0.0596596		MG.1.6	0.0107506	0.186257	0.790027	0.0108592		TM.6.0	0.00510486	0.238162	0.646908	0.108844
BG.2.6	0.00141093	0.381193	0.28193	0.328042		MG.2.6	0.013355	0.145567	0.705511	0.0366878		TM.7.0	0.0445103	0.130134	0.757281	0.0660406
BG.3.6	0.0443674	0.311869	0.603983	0.00413917		MG.3.6	0.00429344	0.472616	0.515231	0.00686596		TM.8.0	0.00855866	0.218056	0.740911	0.0255207
BG.4.6	0.00761057	0.432507	0.536282	0.0227912		MG.4.6	0.0156996	0.152708	0.485879	0.337801		TM.10.0	0.148995	0.274123	0.567422	0.00925471
BG.5.6	0.00634161	0.376775	0.608681	0.00518341		MG.5.6	0.00437848	0.285679	0.634969	0.00783636		TM.1.6	0.122416	0.499028	0.310884	0.0675596
t.test p-val T0 vs T6	0.817325	0.0403111	0.0998014	0.48779		t.test p-val T0 vs T6	0.862534	0.0647706	0.509323	0.336644		TM.2.6	0.0527756	0.212064	0.70893	0.025824
Mean T0	0.0180465	0.243855	0.686293	0.0366783		Mean T0	0.010381	0.387171	0.583212	0.013795		TM.3.6	0.0775624	0.582981	0.282981	0.0562849
Mean T6	0.0156257	0.341922	0.548418	0.0839631		Mean T6	0.00969541	0.248565	0.626324	0.0800101		TM.4.6	0.0182106	0.0746725	0.892655	0.00339218
												TM.5.6	0.0110468	0.47861	0.506993	0.00210245
												TM.6.6	0.0107757	0.18637	0.719187	0.0772776
												TM.7.6	0.0503587	0.180704	0.52908	0.238864
												TM.8.6	0.0024377	0.296971	0.656126	0.0426598
												TM.10.6	0.00204759	0.275735	0.716786	0.00383654
												t.test p-val T0 vs T6	0.757235	0.429931	0.471492	0.560384
												Mean T0	0.0462908	0.257134	0.645643	0.0413871
												Mean T6	0.0386256	0.309682	0.591514	0.0575335

## Sheet: qPCR relative abundance Phylum
ID	Actinobacteria	Bacteroidetes	Firmicutes	Enterobacteria		ID	Actinobacteria	Bacteroidetes	Firmicutes	Enterobacteria		ID	Actinobacteria	Bacteroidetes	Firmicutes	Enterobacteria
TM.1.0	0.000448778	0.287885	0.471617	2.68586e-05		BG.1.0	0.00153444	0.000203259	0.551485	0.00658843		MG.1.0	0.00516777	0.0785977	0.350551	8.08177e-05
TM.2.0	0.00782837	0.19359	0.601354	0.000772709		BG.2.0	0.000934822	0.119206	0.27321	1.12723e-05		MG.2.0	0.00041799	0.084045	0.572245	0.00284697
TM.3.0	0.0563861	0.070935	0.72274	0.0176139		BG.3.0	1.48568e-06	0.0876058	0.370266	0.000139919		MG.3.0	0.0331823	0.0911222	0.490615	0.000850982
TM.4.0	0.00534896	0.410047	0.583851	0.000753614		BG.4.0	0.00156705	0.0467383	0.803335	0.000233663		MG.4.0	0.00345643	0.04875	0.421102	0.0149342
TM.5.0	0.000375539	0.132251	0.291974	0.000850905		BG.5.0	0.00100783	0.0353063	0.418018	0.0256744		MG.5.0	0.0066385	0.315782	0.676552	0.00102717
TM.6.0	0.000588883	0.164368	0.347342	6.62306e-06		BG.1.6	0.0083804	0.0462115	0.510018	0.0372528		MG.1.6	0.00452838	0.0239483	0.461014	0.00300807
TM.7.0	0.00617697	0.0783472	0.461628	9.76642e-05		BG.2.6	0.000544284	0.401367	0.159922	0.00644049		MG.2.6	0.018499	0.0342982	0.625435	0.0216577
TM.8.0	0.00185031	0.0823373	0.565948	8.87473e-05		BG.3.6	0.000150491	0.084238	0.344647	5.44387e-05		MG.3.6	2.6581e-06	0.0529442	0.284381	8.05448e-06
TM.10.0	0.0352891	0.0823652	0.514779	0.0105773		BG.4.6	0.00315123	0.307176	0.483395	4.06145e-06		MG.4.6	0.0159256	0.0215276	0.596514	0.19638
TM.1.6	0.0340056	0.338217	0.385152	0.00151215		BG.5.6	0.0041273	0.0954275	0.628464	0.0134299		t.test p-val T0 vs T6	0.000107778	0.113008	0.885363	0.00152124
TM.2.6	0.0231688	0.146658	0.607467	0.0018962		t.test p-val T0 vs T6	0.172707	0.11674	0.646984	0.579655		t.test	0.79046	0.185384	0.566806	0.320093
TM.3.6	0.0147758	0.320289	0.257136	0.000774411		Mean T0	0.00100913	0.0578119	0.483263	0.00652954		Mean T0	0.00977261	0.123659	0.502213	0.00394803
TM.4.6	5.71765e-06	0.0165524	0.195117	1.55118e-08		Mean T6	0.00327074	0.186884	0.425289	0.0114363		Mean T6	0.00781269	0.0491452	0.570541	0.044515
TM.5.6	0.00546734	0.162822	0.436892	0.000155298
TM.6.6	0.00995147	0.158058	0.831937	1.86726e-06
TM.7.6	0.0102682	0.202558	0.29739	0.00279018
TM.8.6	0.0010744	0.184304	0.613006	0.00012242
TM.10.6	0.00314381	0.0980688	0.896804	0.00198369
t.test p-val T0 vs T6	0.857222	0.788357	0.962737	0.278065
Mean T0	0.0126992	0.166903	0.506804	0.00342092
Mean T6	0.0113179	0.180836	0.502322	0.00102625
